# Supplementary material for: Computational Approach for Probing Redox Potential for Iron-Sulfur Clusters in Photosystem I
Source: MDPI journal article supplement (doi:10.3390/biology11030362), 2022-02-24
Supplement: s1 [file s1]

# Computational Approach for Probing Redox Potential for Iron-Sulfur Clusters in Photosystem I

Fedaa Ali <sup>1,2</sup>, Medhat W. Shafaa <sup>1</sup> and Muhamed Amin <sup>3,4,5\*</sup>

<sup>1</sup> Medical Biophysics Division, Department of Physics, Faculty of Science, Helwan university, Cairo 11795, Egypt; fali5@vols.utk.edu (F.A.); shafaa@science.helwan.edu.eg (M.W.S.)

<sup>2</sup> Genome science and technology, The University of Tennessee, Knoxville, USA

<sup>3</sup> Department of Sciences, University College Groningen, University of Groningen, Hoendiepskade 23/24, 9718 BG Groningen, The Netherlands

<sup>4</sup> Universiteit Groningen Biomolecular Sciences and Biotechnology Institute, University of Groningen, 9718 BG Groningen, The Netherlands

<sup>5</sup> Department of Physics, City College of New York, City University of New York, NY 10031, USA

\* Correspondence: m.a.a.amin@rug.nl

**File S1.** The optimized structure of Fx and surrounding residues within ~10 Å.

|      |    |     |     |   |     |        |        |        |   |   |   |
|------|----|-----|-----|---|-----|--------|--------|--------|---|---|---|
| ATOM | 1  | N   | PRO | A | 577 | 6.394  | 4.624  | 2.9    | 1 | 0 | N |
| ATOM | 2  | CA  | PRO | A | 577 | 4.966  | 4.793  | 2.593  | 1 | 0 | C |
| ATOM | 3  | C   | PRO | A | 577 | 4.083  | 3.702  | 3.23   | 1 | 0 | C |
| ATOM | 4  | O   | PRO | A | 577 | 2.84   | 3.831  | 3.225  | 1 | 0 | O |
| ATOM | 5  | CB  | PRO | A | 577 | 4.88   | 4.719  | 1.038  | 1 | 0 | C |
| ATOM | 6  | CG  | PRO | A | 577 | 6.224  | 4.095  | 0.627  | 1 | 0 | C |
| ATOM | 7  | CD  | PRO | A | 577 | 7.188  | 4.677  | 1.664  | 1 | 0 | C |
| ATOM | 15 | N   | CYS | A | 578 | 4.755  | 2.662  | 3.722  | 1 | 0 | N |
| ATOM | 16 | CA  | CYS | A | 578 | 4.22   | 1.383  | 4.158  | 1 | 0 | C |
| ATOM | 17 | C   | CYS | A | 578 | 5.404  | 0.465  | 4.449  | 1 | 0 | C |
| ATOM | 18 | O   | CYS | A | 578 | 6.563  | 0.82   | 4.369  | 1 | 0 | O |
| ATOM | 19 | CB  | CYS | A | 578 | 3.267  | 0.72   | 3.148  | 1 | 0 | C |
| ATOM | 20 | SG  | CYS | A | 578 | 4.09   | 0.379  | 1.525  | 1 | 0 | S |
| ATOM | 27 | N   | GLY | A | 580 | 4.73   | -2.987 | 3.428  | 1 | 0 | N |
| ATOM | 28 | CA  | GLY | A | 580 | 4.309  | -4.271 | 2.898  | 1 | 0 | C |
| ATOM | 29 | C   | GLY | A | 580 | 2.893  | -4.749 | 3.274  | 1 | 0 | C |
| ATOM | 30 | O   | GLY | A | 580 | 2.274  | -4.267 | 4.241  | 1 | 0 | O |
| ATOM | 34 | N   | PRO | A | 581 | 2.371  | -5.765 | 2.549  | 1 | 0 | N |
| ATOM | 35 | CA  | PRO | A | 581 | 0.97   | -6.197 | 2.733  | 1 | 0 | C |
| ATOM | 36 | C   | PRO | A | 581 | 0.842  | -7.048 | 3.99   | 1 | 0 | C |
| ATOM | 37 | O   | PRO | A | 581 | 0.097  | -7.999 | 4.099  | 1 | 0 | O |
| ATOM | 38 | CB  | PRO | A | 581 | 0.634  | -6.971 | 1.452  | 1 | 0 | C |
| ATOM | 39 | CG  | PRO | A | 581 | 1.998  | -7.507 | 0.987  | 1 | 0 | C |
| ATOM | 40 | CD  | PRO | A | 581 | 2.962  | -6.365 | 1.333  | 1 | 0 | C |
| ATOM | 49 | N   | THR | A | 586 | 0.067  | -2.668 | 5.97   | 1 | 0 | N |
| ATOM | 50 | CA  | THR | A | 586 | 0.818  | -1.639 | 6.701  | 1 | 0 | C |
| ATOM | 51 | C   | THR | A | 586 | 0.652  | -0.245 | 6.056  | 1 | 0 | C |
| ATOM | 52 | O   | THR | A | 586 | 1.416  | 0.69   | 6.329  | 1 | 0 | O |
| ATOM | 53 | CB  | THR | A | 586 | 2.328  | -1.921 | 6.907  | 1 | 0 | C |
| ATOM | 54 | CG2 | THR | A | 586 | 2.581  | -3.182 | 7.737  | 1 | 0 | C |
| ATOM | 55 | OG1 | THR | A | 586 | 3.007  | -1.986 | 5.657  | 1 | 0 | O |
| ATOM | 63 | N   | CYS | A | 587 | -0.397 | -0.094 | 5.223  | 1 | 0 | N |
| ATOM | 64 | CA  | CYS | A | 587 | -0.507 | 1.101  | 4.397  | 1 | 0 | C |
| ATOM | 65 | C   | CYS | A | 587 | -0.295 | 2.395  | 5.226  | 1 | 0 | C |
| ATOM | 66 | O   | CYS | A | 587 | -1.118 | 2.821  | 6.009  | 1 | 0 | O |
| ATOM | 67 | CB  | CYS | A | 587 | -1.89  | 1.203  | 3.741  | 1 | 0 | C |
| ATOM | 68 | SG  | CYS | A | 587 | -2.529 | -0.289 | 2.859  | 1 | 0 | S |
| ATOM | 75 | N   | ILE | A | 724 | 4.441  | 5.732  | -4.711 | 1 | 0 | N |
| ATOM | 76 | CA  | ILE | A | 724 | 3.237  | 5.62   | -3.85  | 1 | 0 | C |
| ATOM | 77 | C   | ILE | A | 724 | 3.056  | 6.925  | -3.057 | 1 | 0 | C |
| ATOM | 78 | O   | ILE | A | 724 | 1.994  | 7.458  | -2.796 | 1 | 0 | O |
| ATOM | 79 | CB  | ILE | A | 724 | 3.296  | 4.393  | -2.886 | 1 | 0 | C |
| ATOM | 80 | CG1 | ILE | A | 724 | 3.426  | 3.077  | -3.69  | 1 | 0 | C |
| ATOM | 81 | CG2 | ILE | A | 724 | 2.097  | 4.329  | -1.928 | 1 | 0 | C |
| ATOM | 82 | CD1 | ILE | A | 724 | 4.123  | 1.954  | -2.915 | 1 | 0 | C |

|      |     |     |     |   |     |         |        |        |   |   |   |
|------|-----|-----|-----|---|-----|---------|--------|--------|---|---|---|
| ATOM | 95  | N   | ARG | A | 728 | -0.037  | 10.187 | -3.419 | 1 | 0 | N |
| ATOM | 96  | CA  | ARG | A | 728 | -0.672  | 10.759 | -2.228 | 1 | 0 | C |
| ATOM | 97  | C   | ARG | A | 728 | -0.577  | 12.298 | -2.276 | 1 | 0 | C |
| ATOM | 98  | O   | ARG | A | 728 | -0.517  | 13.015 | -1.303 | 1 | 0 | O |
| ATOM | 99  | CB  | ARG | A | 728 | -0.191  | 10.175 | -0.884 | 1 | 0 | C |
| ATOM | 100 | CG  | ARG | A | 728 | -0.589  | 8.7    | -0.726 | 1 | 0 | C |
| ATOM | 101 | CD  | ARG | A | 728 | 0.194   | 7.965  | 0.366  | 1 | 0 | C |
| ATOM | 102 | NE  | ARG | A | 728 | -0.323  | 6.6    | 0.496  | 1 | 0 | N |
| ATOM | 103 | CZ  | ARG | A | 728 | 0.264   | 5.579  | 1.158  | 1 | 0 | C |
| ATOM | 104 | NH1 | ARG | A | 728 | 1.413   | 5.759  | 1.809  | 1 | 0 | N |
| ATOM | 105 | NH2 | ARG | A | 728 | -0.358  | 4.393  | 1.198  | 1 | 0 | N |
| ATOM | 120 | N   | CYS | B | 565 | -1.578  | -6.494 | -2.965 | 1 | 0 | N |
| ATOM | 121 | CA  | CYS | B | 565 | -0.523  | -5.866 | -3.687 | 1 | 0 | C |
| ATOM | 122 | C   | CYS | B | 565 | 0.615   | -6.824 | -3.701 | 1 | 0 | C |
| ATOM | 123 | O   | CYS | B | 565 | 0.536   | -7.987 | -3.352 | 1 | 0 | O |
| ATOM | 124 | CB  | CYS | B | 565 | -0.119  | -4.489 | -3.149 | 1 | 0 | C |
| ATOM | 125 | SG  | CYS | B | 565 | 0.476   | -4.599 | -1.4   | 1 | 0 | S |
| ATOM | 132 | N   | GLY | B | 567 | 3.908   | -5.397 | -2.186 | 1 | 0 | N |
| ATOM | 133 | CA  | GLY | B | 567 | 4.673   | -4.42  | -1.441 | 1 | 0 | C |
| ATOM | 134 | C   | GLY | B | 567 | 5.244   | -3.24  | -2.237 | 1 | 0 | C |
| ATOM | 135 | O   | GLY | B | 567 | 5.063   | -3.109 | -3.461 | 1 | 0 | O |
| ATOM | 139 | N   | PRO | B | 568 | 6.014   | -2.379 | -1.526 | 1 | 0 | N |
| ATOM | 140 | CA  | PRO | B | 568 | 6.587   | -1.163 | -2.124 | 1 | 0 | C |
| ATOM | 141 | C   | PRO | B | 568 | 7.888   | -1.535 | -2.83  | 1 | 0 | C |
| ATOM | 142 | O   | PRO | B | 568 | 8.893   | -0.857 | -2.83  | 1 | 0 | O |
| ATOM | 143 | CB  | PRO | B | 568 | 6.817   | -0.228 | -0.932 | 1 | 0 | C |
| ATOM | 144 | CG  | PRO | B | 568 | 7.127   | -1.204 | 0.215  | 1 | 0 | C |
| ATOM | 145 | CD  | PRO | B | 568 | 6.181   | -2.382 | -0.053 | 1 | 0 | C |
| ATOM | 154 | N   | THR | B | 573 | 3.572   | -1.397 | -5.805 | 1 | 0 | N |
| ATOM | 155 | CA  | THR | B | 573 | 2.685   | -2.259 | -6.587 | 1 | 0 | C |
| ATOM | 156 | C   | THR | B | 573 | 1.187   | -1.959 | -6.378 | 1 | 0 | C |
| ATOM | 157 | O   | THR | B | 573 | 0.374   | -2.285 | -7.251 | 1 | 0 | O |
| ATOM | 158 | CB  | THR | B | 573 | 2.943   | -3.786 | -6.398 | 1 | 0 | C |
| ATOM | 159 | CG2 | THR | B | 573 | 4.301   | -4.214 | -6.961 | 1 | 0 | C |
| ATOM | 160 | OG1 | THR | B | 573 | 2.815   | -4.175 | -5.033 | 1 | 0 | O |
| ATOM | 168 | N   | CYS | B | 574 | 0.819   | -1.402 | -5.202 | 1 | 0 | N |
| ATOM | 169 | CA  | CYS | B | 574 | -0.56   | -1.084 | -4.855 | 1 | 0 | C |
| ATOM | 170 | C   | CYS | B | 574 | -1.553  | -2.104 | -5.408 | 1 | 0 | C |
| ATOM | 171 | O   | CYS | B | 574 | -2.739  | -1.867 | -5.553 | 1 | 0 | O |
| ATOM | 172 | CB  | CYS | B | 574 | -0.982  | 0.37   | -5.123 | 1 | 0 | C |
| ATOM | 173 | SG  | CYS | B | 574 | -0.341  | 1.614  | -3.904 | 1 | 0 | S |
| ATOM | 180 | N   | TRP | B | 673 | -5.584  | 4.576  | 4.34   | 1 | 0 | N |
| ATOM | 181 | CA  | TRP | B | 673 | -5.538  | 3.109  | 4.248  | 1 | 0 | C |
| ATOM | 182 | C   | TRP | B | 673 | -4.985  | 2.39   | 5.507  | 1 | 0 | C |
| ATOM | 183 | O   | TRP | B | 673 | -4.856  | 2.954  | 6.571  | 1 | 0 | O |
| ATOM | 184 | CB  | TRP | B | 673 | -4.821  | 2.681  | 2.961  | 1 | 0 | C |
| ATOM | 185 | CG  | TRP | B | 673 | -5.432  | 3.206  | 1.69   | 1 | 0 | C |
| ATOM | 186 | CD1 | TRP | B | 673 | -6.658  | 3.79   | 1.503  | 1 | 0 | C |
| ATOM | 187 | CD2 | TRP | B | 673 | -4.782  | 3.213  | 0.399  | 1 | 0 | C |
| ATOM | 188 | CE2 | TRP | B | 673 | -5.683  | 3.809  | -0.531 | 1 | 0 | C |
| ATOM | 189 | CE3 | TRP | B | 673 | -3.509  | 2.806  | -0.052 | 1 | 0 | C |
| ATOM | 190 | NE1 | TRP | B | 673 | -6.834  | 4.121  | 0.165  | 1 | 0 | N |
| ATOM | 191 | CZ2 | TRP | B | 673 | -5.344  | 4.007  | -1.877 | 1 | 0 | C |
| ATOM | 192 | CZ3 | TRP | B | 673 | -3.163  | 3.014  | -1.387 | 1 | 0 | C |
| ATOM | 193 | CH2 | TRP | B | 673 | -4.073  | 3.61   | -2.287 | 1 | 0 | C |
| ATOM | 205 | N   | ILE | B | 708 | -6.539  | -4.706 | 3.253  | 1 | 0 | N |
| ATOM | 206 | CA  | ILE | B | 708 | -6.254  | -3.843 | 2.087  | 1 | 0 | C |
| ATOM | 207 | C   | ILE | B | 708 | -7.371  | -3.915 | 1.043  | 1 | 0 | C |
| ATOM | 208 | O   | ILE | B | 708 | -8.092  | -2.995 | 0.704  | 1 | 0 | O |
| ATOM | 209 | CB  | ILE | B | 708 | -4.886  | -4.234 | 1.474  | 1 | 0 | C |
| ATOM | 210 | CG1 | ILE | B | 708 | -3.766  | -3.994 | 2.505  | 1 | 0 | C |
| ATOM | 211 | CG2 | ILE | B | 708 | -4.637  | -3.485 | 0.158  | 1 | 0 | C |
| ATOM | 212 | CD1 | ILE | B | 708 | -2.41   | -4.591 | 2.122  | 1 | 0 | C |
| ATOM | 225 | N   | ARG | B | 712 | -11.055 | -1.362 | -0.001 | 1 | 0 | N |
| ATOM | 226 | CA  | ARG | B | 712 | -11.401 | -0.853 | -1.321 | 1 | 0 | C |
| ATOM | 227 | C   | ARG | B | 712 | -12.821 | -1.368 | -1.623 | 1 | 0 | C |
| ATOM | 228 | O   | ARG | B | 712 | -13.21  | -1.753 | -2.703 | 1 | 0 | O |
| ATOM | 229 | CB  | ARG | B | 712 | -10.349 | -1.114 | -2.428 | 1 | 0 | C |
| ATOM | 230 | CG  | ARG | B | 712 | -8.979  | -0.519 | -2.035 | 1 | 0 | C |

|        |     |     |     |   |      |        |        |        |   |   |    |
|--------|-----|-----|-----|---|------|--------|--------|--------|---|---|----|
| ATOM   | 231 | CD  | ARG | B | 712  | -7.823 | -0.761 | -3.024 | 1 | 0 | C  |
| ATOM   | 232 | NE  | ARG | B | 712  | -6.62  | -0.035 | -2.573 | 1 | 0 | N  |
| ATOM   | 233 | CZ  | ARG | B | 712  | -5.397 | -0.552 | -2.305 | 1 | 0 | C  |
| ATOM   | 234 | NH1 | ARG | B | 712  | -4.96  | -1.66  | -2.944 | 1 | 0 | N  |
| ATOM   | 235 | NH2 | ARG | B | 712  | -4.62  | 0.017  | -1.398 | 1 | 0 | N  |
| HETATM | 250 | S   | SUL | A | 3001 | 0.9    | -2.101 | 1.477  | 1 | 0 | S  |
| HETATM | 251 | S   | SUL | A | 3002 | 2.022  | -1.029 | -1.883 | 1 | 0 | S  |
| HETATM | 252 | S   | SUL | A | 3003 | -1.668 | -1.269 | -1.184 | 1 | 0 | S  |
| HETATM | 253 | S   | SUL | A | 3004 | 0.318  | 1.427  | 0.352  | 1 | 0 | S  |
| HETATM | 254 | FE  | FEC | A | 3005 | 0.027  | 0.46   | -1.879 | 1 | 0 | Fe |
| HETATM | 255 | FE  | FEC | A | 3006 | -0.954 | -0.512 | 1.106  | 1 | 0 | Fe |
| HETATM | 256 | FE  | FEC | A | 3007 | 2.108  | -0.234 | 0.427  | 1 | 0 | Fe |
| HETATM | 257 | FE  | FEC | A | 3008 | 0.425  | -2.347 | -0.78  | 1 | 0 | Fe |

File S2. The optimized structure of F<sub>A</sub> and surrounding residues within ~10 Å

|      |    |     |     |   |    |        |        |        |   |   |   |
|------|----|-----|-----|---|----|--------|--------|--------|---|---|---|
| ATOM | 1  | N   | VAL | C | 4  | -2.041 | 8.029  | 1.538  | 1 | 0 | N |
| ATOM | 2  | CA  | VAL | C | 4  | -2.838 | 7.562  | 0.388  | 1 | 0 | C |
| ATOM | 3  | C   | VAL | C | 4  | -2.862 | 8.62   | -0.724 | 1 | 0 | C |
| ATOM | 4  | O   | VAL | C | 4  | -2.679 | 9.804  | -0.53  | 1 | 0 | O |
| ATOM | 5  | CB  | VAL | C | 4  | -4.314 | 7.135  | 0.714  | 1 | 0 | C |
| ATOM | 6  | CG1 | VAL | C | 4  | -5.094 | 6.692  | -0.538 | 1 | 0 | C |
| ATOM | 7  | CG2 | VAL | C | 4  | -4.341 | 6.01   | 1.761  | 1 | 0 | C |
| ATOM | 8  | N   | CYS | C | 20 | -2.141 | -3.745 | -4.675 | 1 | 0 | N |
| ATOM | 9  | CA  | CYS | C | 20 | -2.048 | -3.612 | -3.215 | 1 | 0 | C |
| ATOM | 10 | C   | CYS | C | 20 | -2.448 | -4.923 | -2.511 | 1 | 0 | C |
| ATOM | 11 | O   | CYS | C | 20 | -3.46  | -5.527 | -2.873 | 1 | 0 | O |
| ATOM | 12 | CB  | CYS | C | 20 | -3.006 | -2.492 | -2.765 | 1 | 0 | C |
| ATOM | 13 | SG  | CYS | C | 20 | -3.051 | -2.215 | -0.935 | 1 | 0 | S |
| ATOM | 14 | N   | PRO | C | 21 | -1.675 | -5.379 | -1.476 | 1 | 0 | N |
| ATOM | 15 | CA  | PRO | C | 21 | -2.012 | -6.625 | -0.785 | 1 | 0 | C |
| ATOM | 16 | C   | PRO | C | 21 | -2.89  | -6.467 | 0.476  | 1 | 0 | C |
| ATOM | 17 | O   | PRO | C | 21 | -3.154 | -7.467 | 1.144  | 1 | 0 | O |
| ATOM | 18 | CB  | PRO | C | 21 | -0.634 | -7.182 | -0.388 | 1 | 0 | C |
| ATOM | 19 | CG  | PRO | C | 21 | 0.148  | -5.9   | -0.059 | 1 | 0 | C |
| ATOM | 20 | CD  | PRO | C | 21 | -0.329 | -4.89  | -1.117 | 1 | 0 | C |
| ATOM | 21 | N   | THR | C | 22 | -3.298 | -5.211 | 0.796  | 1 | 0 | N |
| ATOM | 22 | CA  | THR | C | 22 | -4.181 | -4.972 | 1.924  | 1 | 0 | C |
| ATOM | 23 | C   | THR | C | 22 | -5.558 | -4.511 | 1.442  | 1 | 0 | C |
| ATOM | 24 | O   | THR | C | 22 | -6.406 | -4.04  | 2.17   | 1 | 0 | O |
| ATOM | 25 | CB  | THR | C | 22 | -3.605 | -4.001 | 2.989  | 1 | 0 | C |
| ATOM | 26 | CG2 | THR | C | 22 | -2.353 | -4.549 | 3.67   | 1 | 0 | C |
| ATOM | 27 | OG1 | THR | C | 22 | -3.392 | -2.704 | 2.447  | 1 | 0 | O |
| ATOM | 28 | N   | VAL | C | 24 | -6.407 | -1.4   | 0.044  | 1 | 0 | N |
| ATOM | 29 | CA  | VAL | C | 24 | -7.091 | -0.19  | 0.528  | 1 | 0 | C |
| ATOM | 30 | C   | VAL | C | 24 | -7.189 | 0.824  | -0.635 | 1 | 0 | C |
| ATOM | 31 | O   | VAL | C | 24 | -7.337 | 2.039  | -0.48  | 1 | 0 | O |
| ATOM | 32 | CB  | VAL | C | 24 | -6.564 | 0.456  | 1.842  | 1 | 0 | C |
| ATOM | 33 | CG1 | VAL | C | 24 | -7.597 | 1.427  | 2.444  | 1 | 0 | C |
| ATOM | 34 | CG2 | VAL | C | 24 | -6.202 | -0.62  | 2.877  | 1 | 0 | C |
| ATOM | 35 | N   | LEU | C | 25 | -7.136 | 0.239  | -1.862 | 1 | 0 | N |
| ATOM | 36 | CA  | LEU | C | 25 | -7.392 | 0.97   | -3.075 | 1 | 0 | C |
| ATOM | 37 | C   | LEU | C | 25 | -8.678 | 0.511  | -3.743 | 1 | 0 | C |
| ATOM | 38 | O   | LEU | C | 25 | -9.372 | -0.411 | -3.378 | 1 | 0 | O |
| ATOM | 39 | CB  | LEU | C | 25 | -6.228 | 0.906  | -4.097 | 1 | 0 | C |
| ATOM | 40 | CG  | LEU | C | 25 | -4.876 | 1.431  | -3.576 | 1 | 0 | C |
| ATOM | 41 | CD1 | LEU | C | 25 | -3.791 | 1.22   | -4.644 | 1 | 0 | C |
| ATOM | 42 | CD2 | LEU | C | 25 | -4.937 | 2.903  | -3.141 | 1 | 0 | C |
| ATOM | 43 | N   | CYS | C | 47 | -3.231 | 0.361  | 5.202  | 1 | 0 | N |
| ATOM | 44 | CA  | CYS | C | 47 | -1.956 | 0.636  | 4.529  | 1 | 0 | C |
| ATOM | 45 | C   | CYS | C | 47 | -0.846 | 0.456  | 5.568  | 1 | 0 | C |
| ATOM | 46 | O   | CYS | C | 47 | -0.899 | 1.017  | 6.661  | 1 | 0 | O |
| ATOM | 47 | CB  | CYS | C | 47 | -1.881 | 2.059  | 3.924  | 1 | 0 | C |
| ATOM | 48 | SG  | CYS | C | 47 | -0.263 | 2.552  | 3.154  | 1 | 0 | S |
| ATOM | 49 | N   | VAL | C | 48 | 0.199  | -0.343 | 5.185  | 1 | 0 | N |
| ATOM | 50 | CA  | VAL | C | 48 | 1.368  | -0.534 | 6.025  | 1 | 0 | C |
| ATOM | 51 | C   | VAL | C | 48 | 2.67   | 0.029  | 5.419  | 1 | 0 | C |
| ATOM | 52 | O   | VAL | C | 48 | 3.762  | -0.193 | 5.937  | 1 | 0 | O |
| ATOM | 53 | CB  | VAL | C | 48 | 1.56   | -1.992 | 6.516  | 1 | 0 | C |

|        |     |     |     |   |      |        |        |        |   |   |     |
|--------|-----|-----|-----|---|------|--------|--------|--------|---|---|-----|
| ATOM   | 54  | CG1 | VAL | C | 48   | 0.384  | -2.426 | 7.4    | 1 | 0 | C   |
| ATOM   | 55  | CG2 | VAL | C | 48   | 1.783  | -2.981 | 5.361  | 1 | 0 | C   |
| ATOM   | 56  | N   | GLY | C | 49   | 2.542  | 0.811  | 4.3    | 1 | 0 | N   |
| ATOM   | 57  | CA  | GLY | C | 49   | 3.627  | 1.677  | 3.889  | 1 | 0 | C   |
| ATOM   | 58  | C   | GLY | C | 49   | 4.656  | 1.109  | 2.907  | 1 | 0 | C   |
| ATOM   | 59  | O   | GLY | C | 49   | 5.598  | 1.838  | 2.529  | 1 | 0 | O   |
| ATOM   | 60  | N   | CYS | C | 50   | 4.503  | -0.166 | 2.53   | 1 | 0 | N   |
| ATOM   | 61  | CA  | CYS | C | 50   | 5.483  | -1.017 | 1.857  | 1 | 0 | C   |
| ATOM   | 62  | C   | CYS | C | 50   | 5.85   | -0.764 | 0.37   | 1 | 0 | C   |
| ATOM   | 63  | O   | CYS | C | 50   | 6.782  | -1.421 | -0.095 | 1 | 0 | O   |
| ATOM   | 64  | CB  | CYS | C | 50   | 5.022  | -2.47  | 2      | 1 | 0 | C   |
| ATOM   | 65  | SG  | CYS | C | 50   | 3.441  | -2.827 | 1.099  | 1 | 0 | S   |
| ATOM   | 66  | N   | LYS | C | 51   | 5.152  | 0.155  | -0.331 | 1 | 0 | N   |
| ATOM   | 67  | CA  | LYS | C | 51   | 5.585  | 0.673  | -1.633 | 1 | 0 | C   |
| ATOM   | 68  | C   | LYS | C | 51   | 5.512  | -0.339 | -2.799 | 1 | 0 | C   |
| ATOM   | 69  | O   | LYS | C | 51   | 6.444  | -0.502 | -3.579 | 1 | 0 | O   |
| ATOM   | 70  | CB  | LYS | C | 51   | 6.972  | 1.336  | -1.573 | 1 | 0 | C   |
| ATOM   | 71  | CG  | LYS | C | 51   | 7.024  | 2.48   | -0.553 | 1 | 0 | C   |
| ATOM   | 72  | CD  | LYS | C | 51   | 6.174  | 3.691  | -0.978 | 1 | 0 | C   |
| ATOM   | 73  | CE  | LYS | C | 51   | 5.765  | 4.621  | 0.154  | 1 | 0 | C   |
| ATOM   | 74  | NZ  | LYS | C | 51   | 4.72   | 4.02   | 1.066  | 1 | 0 | N1+ |
| ATOM   | 75  | N   | ARG | C | 52   | 4.291  | -0.929 | -2.962 | 1 | 0 | N   |
| ATOM   | 76  | CA  | ARG | C | 52   | 4.005  | -1.821 | -4.075 | 1 | 0 | C   |
| ATOM   | 77  | C   | ARG | C | 52   | 2.819  | -1.348 | -4.954 | 1 | 0 | C   |
| ATOM   | 78  | O   | ARG | C | 52   | 2.242  | -2.136 | -5.699 | 1 | 0 | O   |
| ATOM   | 79  | CB  | ARG | C | 52   | 3.819  | -3.272 | -3.601 | 1 | 0 | C   |
| ATOM   | 80  | CG  | ARG | C | 52   | 5.133  | -3.852 | -3.058 | 1 | 0 | C   |
| ATOM   | 81  | CD  | ARG | C | 52   | 4.988  | -5.233 | -2.416 | 1 | 0 | C   |
| ATOM   | 82  | NE  | ARG | C | 52   | 4.332  | -5.143 | -1.103 | 1 | 0 | N   |
| ATOM   | 83  | CZ  | ARG | C | 52   | 4.095  | -6.184 | -0.315 | 1 | 0 | C   |
| ATOM   | 84  | NH1 | ARG | C | 52   | 4.311  | -7.444 | -0.77  | 1 | 0 | N1+ |
| ATOM   | 85  | NH2 | ARG | C | 52   | 3.705  | -6     | 0.956  | 1 | 0 | N   |
| ATOM   | 86  | N   | CYS | C | 53   | 2.558  | -0.015 | -4.899 | 1 | 0 | N   |
| ATOM   | 87  | CA  | CYS | C | 53   | 1.424  | 0.614  | -5.549 | 1 | 0 | C   |
| ATOM   | 88  | C   | CYS | C | 53   | 1.878  | 1.46   | -6.741 | 1 | 0 | C   |
| ATOM   | 89  | O   | CYS | C | 53   | 1.204  | 2.314  | -7.269 | 1 | 0 | O   |
| ATOM   | 90  | CB  | CYS | C | 53   | 0.562  | 1.447  | -4.58  | 1 | 0 | C   |
| ATOM   | 91  | SG  | CYS | C | 53   | 1.572  | 2.514  | -3.431 | 1 | 0 | S   |
| ATOM   | 92  | N   | VAL | C | 66   | 2.624  | 7.487  | -1.949 | 1 | 0 | N   |
| ATOM   | 93  | CA  | VAL | C | 66   | 2.3    | 7.361  | -0.488 | 1 | 0 | C   |
| ATOM   | 94  | C   | VAL | C | 66   | 3.539  | 7.716  | 0.399  | 1 | 0 | C   |
| ATOM   | 95  | O   | VAL | C | 66   | 4.091  | 6.97   | 1.187  | 1 | 0 | O   |
| ATOM   | 96  | CB  | VAL | C | 66   | 1.611  | 6.043  | -0.057 | 1 | 0 | C   |
| ATOM   | 97  | CG1 | VAL | C | 66   | 1.066  | 6.129  | 1.381  | 1 | 0 | C   |
| ATOM   | 98  | CG2 | VAL | C | 66   | 0.476  | 5.663  | -1.022 | 1 | 0 | C   |
| HETATM | 99  | S   | SUL | C | 3211 | -1.309 | 1.57   | -0.592 | 1 | 0 | S   |
| HETATM | 100 | S   | SUL | C | 3212 | 2.279  | 1.519  | 0.503  | 1 | 0 | S   |
| HETATM | 101 | S   | SUL | C | 3213 | -0.177 | -1.12  | 1.758  | 1 | 0 | S   |
| HETATM | 102 | S   | SUL | C | 3214 | 0.997  | -1.169 | -1.731 | 1 | 0 | S   |
| HETATM | 103 | FE  | FEC | C | 3221 | 1.849  | -1.018 | 0.475  | 1 | 0 | Fe  |
| HETATM | 104 | FE  | FEC | C | 3222 | -1.166 | -0.885 | -0.553 | 1 | 0 | Fe  |
| HETATM | 105 | FE  | FEC | C | 3223 | 0.915  | 1.281  | -1.546 | 1 | 0 | Fe  |
| HETATM | 106 | FE  | FEC | C | 3224 | 0.035  | 1.199  | 1.265  | 1 | 0 | Fe  |

File S3. The optimized structure of F<sub>B</sub> and surrounding residues within ~10 Å.

|      |    |     |     |   |    |        |       |        |   |   |   |
|------|----|-----|-----|---|----|--------|-------|--------|---|---|---|
| ATOM | 1  | N   | ILE | C | 6  | -0.95  | 9.067 | -1.282 | 1 | 0 | N |
| ATOM | 2  | CA  | ILE | C | 6  | -0.651 | 8.159 | -0.182 | 1 | 0 | C |
| ATOM | 3  | C   | ILE | C | 6  | -1.753 | 8.269 | 0.849  | 1 | 0 | C |
| ATOM | 4  | O   | ILE | C | 6  | -2.419 | 9.281 | 0.987  | 1 | 0 | O |
| ATOM | 5  | CB  | ILE | C | 6  | 0.734  | 8.493 | 0.453  | 1 | 0 | C |
| ATOM | 6  | CG1 | ILE | C | 6  | 1.84   | 8.436 | -0.62  | 1 | 0 | C |
| ATOM | 7  | CG2 | ILE | C | 6  | 1.041  | 7.589 | 1.659  | 1 | 0 | C |
| ATOM | 8  | CD1 | ILE | C | 6  | 3.146  | 9.129 | -0.214 | 1 | 0 | C |
| ATOM | 21 | N   | CYS | C | 10 | -3.081 | 3.043 | 4.418  | 1 | 0 | N |
| ATOM | 22 | CA  | CYS | C | 10 | -1.952 | 2.128 | 4.131  | 1 | 0 | C |
| ATOM | 23 | C   | CYS | C | 10 | -1.873 | 1.112 | 5.281  | 1 | 0 | C |
| ATOM | 24 | O   | CYS | C | 10 | -2.007 | 1.49  | 6.45   | 1 | 0 | O |
| ATOM | 25 | CB  | CYS | C | 10 | -0.614 | 2.896 | 4.012  | 1 | 0 | C |

|      |     |     |     |   |    |        |        |        |   |   |   |
|------|-----|-----|-----|---|----|--------|--------|--------|---|---|---|
| ATOM | 26  | SG  | CYS | C | 10 | 0.859  | 1.891  | 3.524  | 1 | 0 | S |
| ATOM | 31  | N   | ILE | C | 11 | -1.614 | -0.172 | 4.923  | 1 | 0 | N |
| ATOM | 32  | CA  | ILE | C | 11 | -1.318 | -1.209 | 5.902  | 1 | 0 | C |
| ATOM | 33  | C   | ILE | C | 11 | 0.079  | -1.853 | 5.724  | 1 | 0 | C |
| ATOM | 34  | O   | ILE | C | 11 | 0.397  | -2.824 | 6.409  | 1 | 0 | O |
| ATOM | 35  | CB  | ILE | C | 11 | -2.414 | -2.302 | 6.016  | 1 | 0 | C |
| ATOM | 36  | CG1 | ILE | C | 11 | -2.544 | -3.136 | 4.726  | 1 | 0 | C |
| ATOM | 37  | CG2 | ILE | C | 11 | -3.746 | -1.679 | 6.46   | 1 | 0 | C |
| ATOM | 38  | CD1 | ILE | C | 11 | -3.491 | -4.336 | 4.843  | 1 | 0 | C |
| ATOM | 50  | N   | GLY | C | 12 | 0.917  | -1.284 | 4.814  | 1 | 0 | N |
| ATOM | 51  | CA  | GLY | C | 12 | 2.317  | -1.672 | 4.769  | 1 | 0 | C |
| ATOM | 52  | C   | GLY | C | 12 | 2.665  | -2.972 | 4.026  | 1 | 0 | C |
| ATOM | 53  | O   | GLY | C | 12 | 3.678  | -3.597 | 4.33   | 1 | 0 | O |
| ATOM | 57  | N   | CYS | C | 13 | 1.844  | -3.34  | 3.003  | 1 | 0 | N |
| ATOM | 58  | CA  | CYS | C | 13 | 1.992  | -4.635 | 2.349  | 1 | 0 | C |
| ATOM | 59  | C   | CYS | C | 13 | 3.078  | -4.728 | 1.25   | 1 | 0 | C |
| ATOM | 60  | O   | CYS | C | 13 | 3.474  | -5.84  | 0.902  | 1 | 0 | O |
| ATOM | 61  | CB  | CYS | C | 13 | 0.646  | -5.123 | 1.785  | 1 | 0 | C |
| ATOM | 62  | SG  | CYS | C | 13 | 0.061  | -4.291 | 0.241  | 1 | 0 | S |
| ATOM | 67  | N   | THR | C | 14 | 3.5    | -3.557 | 0.718  | 1 | 0 | N |
| ATOM | 68  | CA  | THR | C | 14 | 4.551  | -3.381 | -0.278 | 1 | 0 | C |
| ATOM | 69  | C   | THR | C | 14 | 4.239  | -3.931 | -1.691 | 1 | 0 | C |
| ATOM | 70  | O   | THR | C | 14 | 5.162  | -4.333 | -2.411 | 1 | 0 | O |
| ATOM | 71  | CB  | THR | C | 14 | 5.999  | -3.788 | 0.158  | 1 | 0 | C |
| ATOM | 72  | CG2 | THR | C | 14 | 6.257  | -3.509 | 1.633  | 1 | 0 | C |
| ATOM | 73  | OG1 | THR | C | 14 | 6.337  | -5.14  | -0.083 | 1 | 0 | O |
| ATOM | 81  | N   | GLN | C | 15 | 2.959  | -3.843 | -2.138 | 1 | 0 | N |
| ATOM | 82  | CA  | GLN | C | 15 | 2.602  | -4.321 | -3.476 | 1 | 0 | C |
| ATOM | 83  | C   | GLN | C | 15 | 2.613  | -3.253 | -4.591 | 1 | 0 | C |
| ATOM | 84  | O   | GLN | C | 15 | 2.76   | -3.614 | -5.761 | 1 | 0 | O |
| ATOM | 85  | CB  | GLN | C | 15 | 1.221  | -5.041 | -3.496 | 1 | 0 | C |
| ATOM | 86  | CG  | GLN | C | 15 | 1.313  | -6.575 | -3.611 | 1 | 0 | C |
| ATOM | 87  | CD  | GLN | C | 15 | 2.171  | -7.28  | -2.554 | 1 | 0 | C |
| ATOM | 88  | NE2 | GLN | C | 15 | 1.86   | -6.991 | -1.258 | 1 | 0 | N |
| ATOM | 89  | OE1 | GLN | C | 15 | 3.047  | -8.082 | -2.872 | 1 | 0 | O |
| ATOM | 98  | N   | CYS | C | 16 | 2.378  | -1.959 | -4.255 | 1 | 0 | N |
| ATOM | 99  | CA  | CYS | C | 16 | 2.147  | -0.968 | -5.292 | 1 | 0 | C |
| ATOM | 100 | C   | CYS | C | 16 | 3.457  | -0.461 | -5.893 | 1 | 0 | C |
| ATOM | 101 | O   | CYS | C | 16 | 3.513  | 0.155  | -6.936 | 1 | 0 | O |
| ATOM | 102 | CB  | CYS | C | 16 | 1.304  | 0.223  | -4.808 | 1 | 0 | C |
| ATOM | 103 | SG  | CYS | C | 16 | 2.123  | 1.224  | -3.482 | 1 | 0 | S |
| ATOM | 110 | N   | MET | C | 27 | 8.93   | 2.585  | -0.404 | 1 | 0 | N |
| ATOM | 111 | CA  | MET | C | 27 | 8.512  | 2.423  | 0.981  | 1 | 0 | C |
| ATOM | 112 | C   | MET | C | 27 | 9.359  | 3.256  | 1.918  | 1 | 0 | C |
| ATOM | 113 | O   | MET | C | 27 | 10.45  | 3.718  | 1.648  | 1 | 0 | O |
| ATOM | 114 | CB  | MET | C | 27 | 8.552  | 0.978  | 1.562  | 1 | 0 | C |
| ATOM | 115 | CG  | MET | C | 27 | 7.809  | -0.064 | 0.719  | 1 | 0 | C |
| ATOM | 116 | SD  | MET | C | 27 | 6.078  | 0.336  | 0.275  | 1 | 0 | S |
| ATOM | 117 | CE  | MET | C | 27 | 5.324  | 0.539  | 1.931  | 1 | 0 | C |
| ATOM | 128 | N   | ALA | C | 39 | 3.684  | 3.755  | 1.694  | 1 | 0 | N |
| ATOM | 129 | CA  | ALA | C | 39 | 3.869  | 3.986  | 0.287  | 1 | 0 | C |
| ATOM | 130 | C   | ALA | C | 39 | 4.378  | 5.379  | 0.131  | 1 | 0 | C |
| ATOM | 131 | O   | ALA | C | 39 | 4.386  | 6.224  | 1.007  | 1 | 0 | O |
| ATOM | 132 | CB  | ALA | C | 39 | 2.621  | 3.821  | -0.609 | 1 | 0 | C |
| ATOM | 139 | N   | CYS | C | 57 | -3.266 | -2.325 | -5.023 | 1 | 0 | N |
| ATOM | 140 | CA  | CYS | C | 57 | -3.532 | -2.014 | -3.611 | 1 | 0 | C |
| ATOM | 141 | C   | CYS | C | 57 | -4.765 | -2.813 | -3.18  | 1 | 0 | C |
| ATOM | 142 | O   | CYS | C | 57 | -5.793 | -2.781 | -3.862 | 1 | 0 | O |
| ATOM | 143 | CB  | CYS | C | 57 | -3.78  | -0.512 | -3.359 | 1 | 0 | C |
| ATOM | 144 | SG  | CYS | C | 57 | -4.009 | -0.064 | -1.576 | 1 | 0 | S |
| ATOM | 150 | N   | PRO | C | 58 | -4.686 | -3.509 | -2.004 | 1 | 0 | N |
| ATOM | 151 | CA  | PRO | C | 58 | -5.799 | -4.348 | -1.56  | 1 | 0 | C |
| ATOM | 152 | C   | PRO | C | 58 | -6.68  | -3.749 | -0.446 | 1 | 0 | C |
| ATOM | 153 | O   | PRO | C | 58 | -7.533 | -4.462 | 0.09   | 1 | 0 | O |
| ATOM | 154 | CB  | PRO | C | 58 | -5.088 | -5.605 | -1.023 | 1 | 0 | C |
| ATOM | 155 | CG  | PRO | C | 58 | -3.839 | -5.007 | -0.354 | 1 | 0 | C |
| ATOM | 156 | CD  | PRO | C | 58 | -3.428 | -3.861 | -1.295 | 1 | 0 | C |
| ATOM | 164 | N   | THR | C | 59 | -6.45  | -2.466 | -0.058 | 1 | 0 | N |
| ATOM | 165 | CA  | THR | C | 59 | -7.311 | -1.894 | 0.952  | 1 | 0 | C |

|        |     |     |     |   |      |        |        |        |   |   |    |
|--------|-----|-----|-----|---|------|--------|--------|--------|---|---|----|
| ATOM   | 166 | C   | THR | C | 59   | -8.665 | -1.469 | 0.398  | 1 | 0 | C  |
| ATOM   | 167 | O   | THR | C | 59   | -9.05  | -1.601 | -0.738 | 1 | 0 | O  |
| ATOM   | 168 | CB  | THR | C | 59   | -6.691 | -0.751 | 1.785  | 1 | 0 | C  |
| ATOM   | 169 | CG2 | THR | C | 59   | -5.378 | -1.157 | 2.45   | 1 | 0 | C  |
| ATOM   | 170 | OG1 | THR | C | 59   | -6.556 | 0.386  | 0.952  | 1 | 0 | O  |
| ATOM   | 179 | N   | SER | C | 63   | -5.573 | 3.109  | -1.005 | 1 | 0 | N  |
| ATOM   | 180 | CA  | SER | C | 63   | -4.83  | 3.909  | -0.012 | 1 | 0 | C  |
| ATOM   | 181 | C   | SER | C | 63   | -3.809 | 4.816  | -0.737 | 1 | 0 | C  |
| ATOM   | 182 | O   | SER | C | 63   | -3.058 | 5.601  | -0.148 | 1 | 0 | O  |
| ATOM   | 183 | CB  | SER | C | 63   | -4.088 | 3.143  | 1.097  | 1 | 0 | C  |
| ATOM   | 184 | OG  | SER | C | 63   | -5.012 | 2.592  | 2.048  | 1 | 0 | O  |
| ATOM   | 190 | N   | ILE | C | 64   | -3.851 | 4.653  | -2.073 | 1 | 0 | N  |
| ATOM   | 191 | CA  | ILE | C | 64   | -3.067 | 5.389  | -3.017 | 1 | 0 | C  |
| ATOM   | 192 | C   | ILE | C | 64   | -3.847 | 5.427  | -4.306 | 1 | 0 | C  |
| ATOM   | 193 | O   | ILE | C | 64   | -4.921 | 4.892  | -4.492 | 1 | 0 | O  |
| ATOM   | 194 | CB  | ILE | C | 64   | -1.625 | 4.812  | -3.233 | 1 | 0 | C  |
| ATOM   | 195 | CG1 | ILE | C | 64   | -0.724 | 5.809  | -3.99  | 1 | 0 | C  |
| ATOM   | 196 | CG2 | ILE | C | 64   | -1.666 | 3.425  | -3.888 | 1 | 0 | C  |
| ATOM   | 197 | CD1 | ILE | C | 64   | 0.77   | 5.475  | -3.901 | 1 | 0 | C  |
| HETATM | 210 | S   | SUL | C | 3311 | 2.005  | -0.426 | 0.518  | 1 | 0 | S  |
| HETATM | 211 | S   | SUL | C | 3312 | -1.652 | -0.847 | 1.544  | 1 | 0 | S  |
| HETATM | 212 | S   | SUL | C | 3313 | -0.702 | 1.98   | -0.531 | 1 | 0 | S  |
| HETATM | 213 | S   | SUL | C | 3314 | -0.427 | -1.462 | -2.023 | 1 | 0 | S  |
| HETATM | 214 | FE  | FEC | C | 3321 | -1.809 | -0.107 | -0.716 | 1 | 0 | Fe |
| HETATM | 215 | FE  | FEC | C | 3322 | 1.038  | 0.485  | -1.528 | 1 | 0 | Fe |
| HETATM | 216 | FE  | FEC | C | 3323 | 0.123  | -1.894 | 0.312  | 1 | 0 | Fe |
| HETATM | 217 | FE  | FEC | C | 3324 | 0.143  | 0.935  | 1.457  | 1 | 0 | Fe |
